# Supplementary material for: Microbiological Properties and Cytotoxicity of PNVCL Hydrogels Containing Flavonoids as Intracanal Medication for Endodontic Therapy
Source: MDPI journal article supplement (doi:10.3390/jfb13040305), 2022-12-17
Supplement: s1 [file s1]

**Table S1.** Compounds used in this study: codes, synonyms, chemical structure, empirical formula, and molecular weight.

| Compound Code*                           | Synonyms                                                                                                                                        | Chemical structure                                                                   | Molecular weight (g/mol) |
|------------------------------------------|-------------------------------------------------------------------------------------------------------------------------------------------------|--------------------------------------------------------------------------------------|--------------------------|
| Ampelopsin (AMP)<br>42866                | (2R,3R)-3,5,7-Trihydroxy-2-(3,4,5-trihydroxyphenyl)-2,3-dihydrochromen-4-one, Ampelopsin, DHM, 3,3',4',5,5',7'-Hexahydroxyflavanone, Ampeloptin | 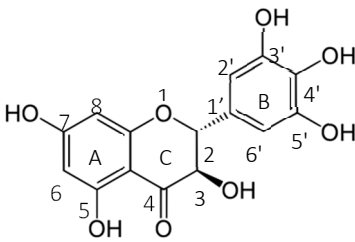   | 320.25                   |
| Isoquercitrin (ISO)<br>#17793            | 3,3',4',5,7-Pentahydroxyflavone 3- $\beta$ -glucoside, Isoquercitrin                                                                            |   | 464.38                   |
| Rutin (RUT)<br>#R5143                    | Quercetin-3-rutinoside hydrate, Vitamin P hydrate                                                                                               |  | 610.52                   |
| Chlorexidine digluconate (CHX)<br>#C9394 | 1,6-Bis(N <sup>5</sup> -[p-chlorophenyl]-N <sup>1</sup> -biguanido)hexane; 1,1'-Hexamethylenebis(5-[p-chlorophenyl]biguanide)                   |  | 505.44                   |
| Calcium hydroxide (CH)<br>#232932        | calcium hydrate, lime, hydrated lime, caustic lime, lime hydrate, slaked lime                                                                   |  | 74.09                    |

|                                    |                                                                                 |                                                                                    |                                 |
|------------------------------------|---------------------------------------------------------------------------------|------------------------------------------------------------------------------------|---------------------------------|
| Poly(N-vinylcaprolactam) (PNVCL)** | 1-Ethenylazepan-2-one, 1-Ethenylhexahydro-2H -azepin-2-one, 1-Vinylazepan-2-one | 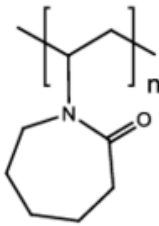 | $M_n = 25451$<br>$M_z = 153671$ |
|------------------------------------|---------------------------------------------------------------------------------|------------------------------------------------------------------------------------|---------------------------------|

\*Codes and information taken from the Sigma-Aldrich company website (<https://www.sigmaaldrich.com>).

\*\* [1]

1. Sala, R.L.; Kwon, M.Y.; Kim, M.; Gullbrand, S.E.; Henning, E.A.; Mauck, R.L.; Camargo, E.R.; Burdick, J.A. Thermosensitive poly(N-vinylcaprolactam) Injectable hydrogels for cartilage tissue engineering. *Tissue Eng. Part A*. 2017, 23, 935–945.
